# Supplementary material for: Fast and versatile electrodeposition of vertically aligned layered rare-earth hydroxide nanosheets for multicolour luminescence and oil/water separation
Source: Royal Society of Chemistry journal article supplement (doi:10.1039/d3tc04685k), 2024-01-01
Supplement: d3tc04685k2.pdf [file d3tc04685k2.pdf]

# Fast and Versatile Electrodeposition of vertically Aligned Layered Rare-Earth Hydroxide (LREH) Nanosheets for Multicolor luminescence and Oil/Water Separation

Xiaoli Wu<sup>1,2,3</sup>, Yongping Guo<sup>1,2</sup>, Ji-Guang Li<sup>4\*</sup> and Yuanli Liu<sup>1,2,3\*</sup>

1 College of Materials Science and Engineering, Guilin University of Technology, Guilin 541004, P. R. China

2 Guangxi Key Laboratory of Optical and Electronic Materials and Devices, Guilin University of Technology, Guilin 541004, P. R. China

3 Collaborative Innovation Center for Exploration of Hidden Nonferrous Metal Deposits and Development of New Materials in Guangxi; Guilin University of Technology, Guilin 541004, China

4 Advanced Materials Processing Unit, National Institute for Materials Science, Namiki 1-1, Tsukuba, Ibaraki 305-0044, Japan

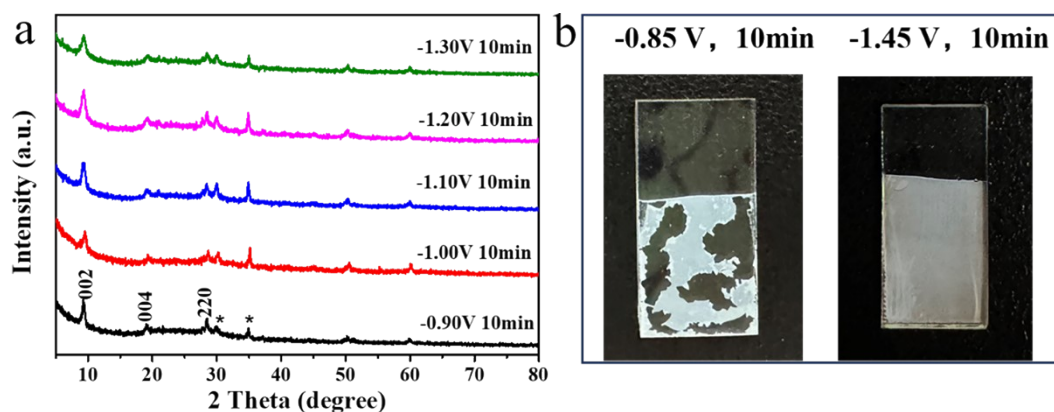

Fig. S1. XRD patterns (a), and actual picture (b) of the  $\text{Y}_2(\text{OH})_5\text{NO}_3 \cdot n\text{H}_2\text{O}$  film fabricated under different working voltages at room temperature. The peaks marked by asterisks are from the ITO substrate.

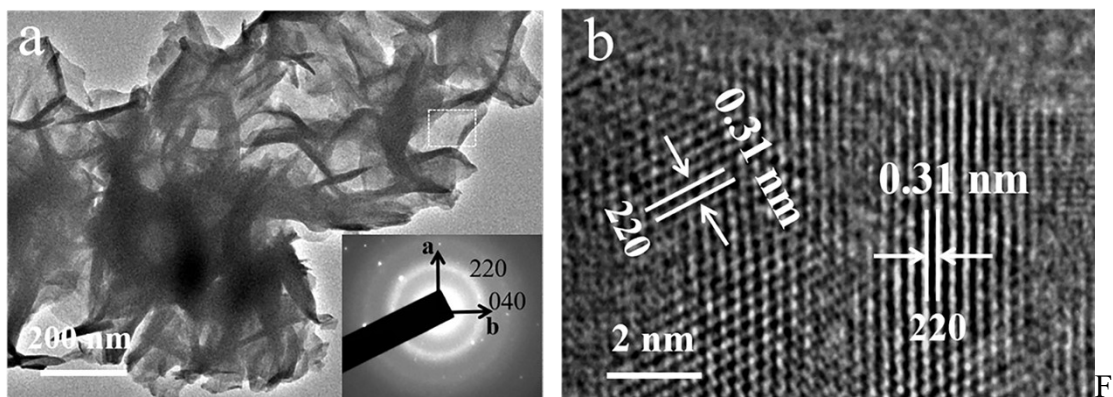

Fig. S2. TEM image (a), and HR-TEM image (b) of the electrodeposited  $\text{Y}_2(\text{OH})_5\text{NO}_3 \cdot n\text{H}_2\text{O}$  film. The inset in (a) selected area electron diffraction (SAED) taken from the rectangle area.

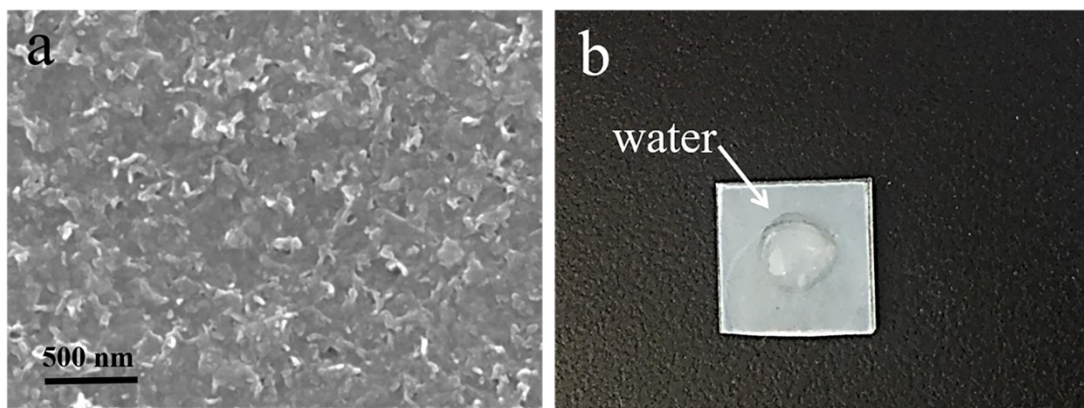

Fig. S3. SEM morphology (a) and the physical image of water droplets attached to the surface (b) of  $\text{Y}_2(\text{OH})_5\text{NO}_3 \cdot n\text{H}_2\text{O}$  film prepared *via* traditional technique.

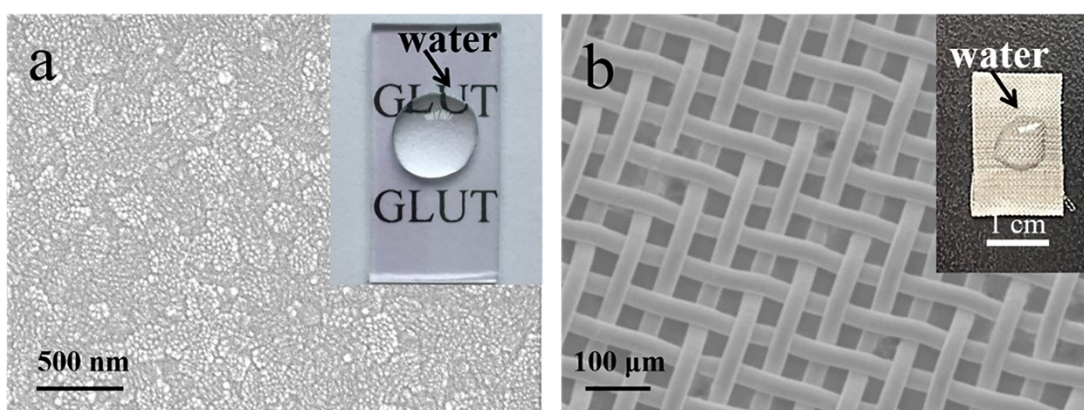

Fig. S4. FE-SEM image of the surface for ITO glass (a) and the original nickel mesh substrate (b). The insets in (a) and (b) are the corresponding physical images of water droplets attached to the surface, respectively.



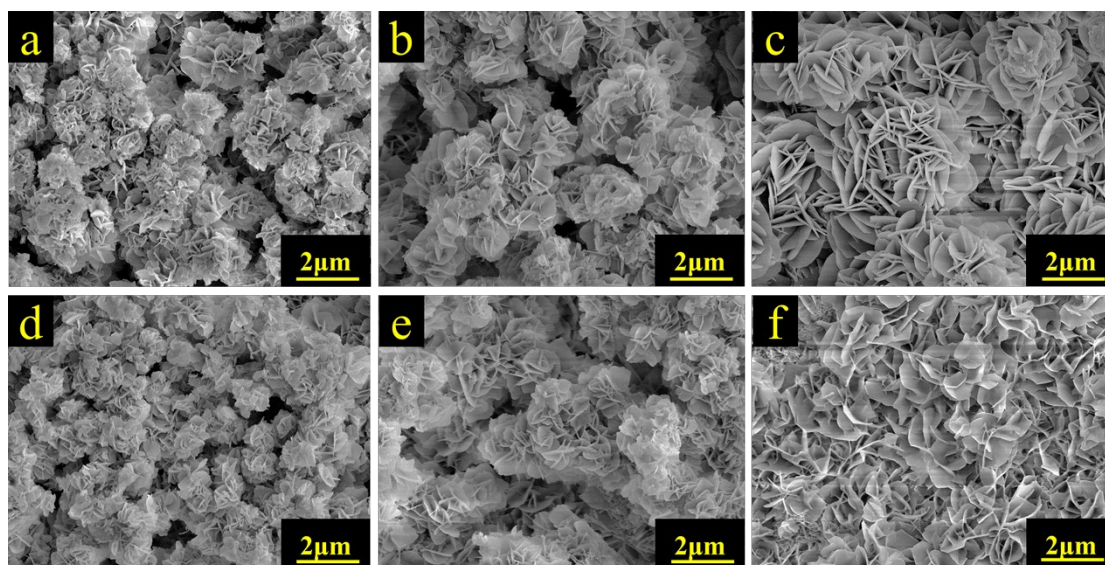

Fig. S5. FE-SEM morphologies of the  $\text{Y}_2(\text{OH})_5\text{NO}_3 \cdot n\text{H}_2\text{O}$  films fabricated under 30 °C, -1.10 V, 0.1 M (a); 55 °C, -1.10 V, 0.1 M (b); 70 °C, -1.10 V, 0.1 M (c); 40 °C, -1.10 V, 0.1 M (d); 40 °C, -1.20 V, 0.1 M (e); and 40 °C, -1.30 V, 0.1 M (f).

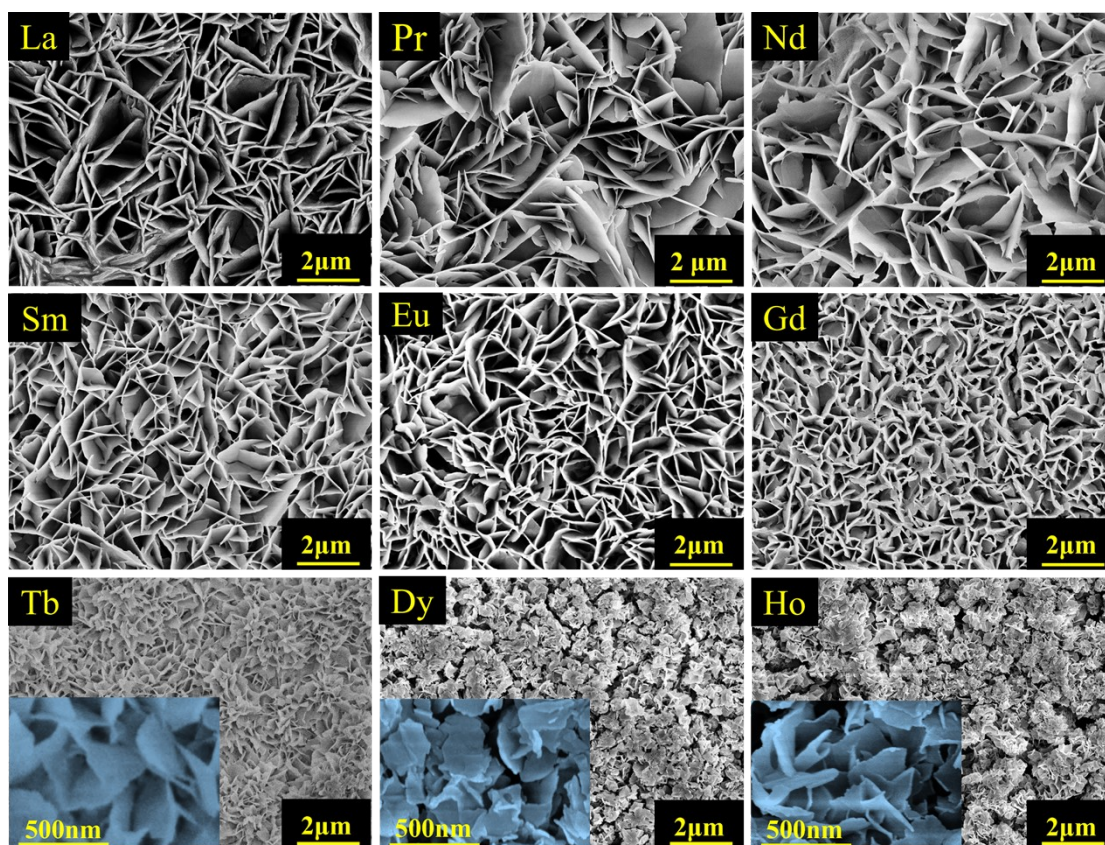

Fig. S6. FE-SEM morphologies of the  $\text{RE}_2(\text{OH})_5\text{NO}_3 \cdot n\text{H}_2\text{O}$  (RE = La, Pr, Nd, Sm, Eu, Gd, Tb, Dy and Ho) films prepared using 0.1 M  $\text{RE}(\text{NO}_3)_3$  and under the working voltage of -1.15 V at room temperature.

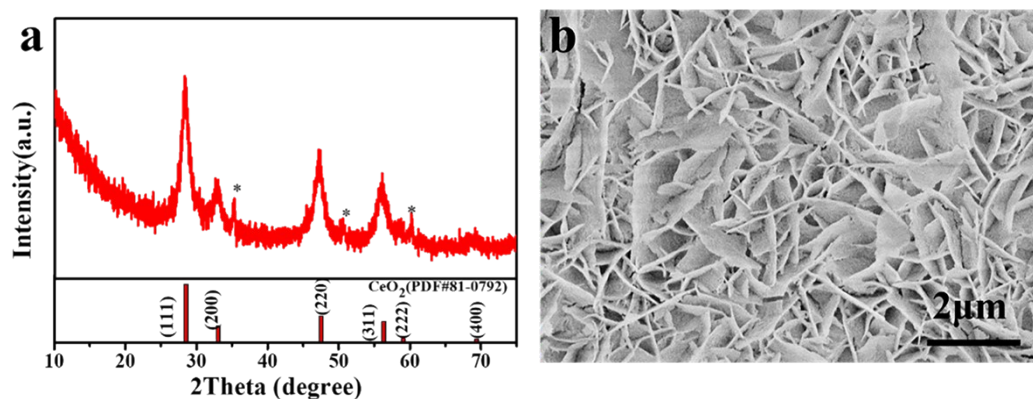

Fig. S7. XRD pattern (a) and FE-SEM observation (b) of the  $\text{CeO}_2$  film fabricated using 0.1 M  $\text{Ce}(\text{NO}_3)_3$  and under the working voltage of -1.15 V at room temperature. The peaks marked by asterisks are from the ITO substrate.

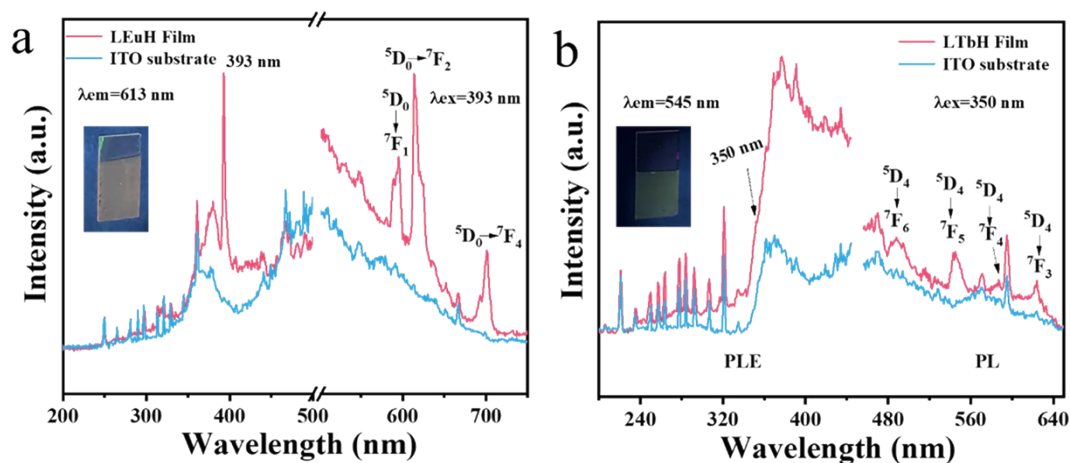

Fig. S8. PL/PLE spectra of the LEuH films under the 393 nm excitation (a); PL/PLE spectra of the LTbH films under the 350 nm excitation (b). The insets of (a-b) show luminescence of the corresponding LEuH/LTbH films under 365 nm excitation from a hand-held UV lamp.
